# Supplementary material for: Synthesis of magnetic nanoparticles with an IDA or TED modified surface for purification and immobilization of poly-histidine tagged proteins
Source: PubMed Central journal article supplement — RSC Adv. 2020 Mar 20;10(19):11524–34. doi: 10.1039/c9ra10473a (PMC9050487; doi:10.1039/c9ra10473a), 2020-03-20
Supplement: RA-010-C9RA10473A-s001.pdf [file RA-010-C9RA10473A-s001.pdf]

## Synthesis of Magnetic Nanoparticles with IDA or TED Modified Surface for Purification and Immobilization of Poly-Histidine Tagged Proteins

Kai Zeng<sup>1</sup>, En-Jie Sun<sup>1,\*</sup>, Ze-Wen Liu<sup>1</sup>, Junhui Guo<sup>1</sup>, Chengqing Yuan<sup>2</sup>, Ying Yang<sup>3</sup>, Hao Xie<sup>1,\*</sup>

### Supporting Information

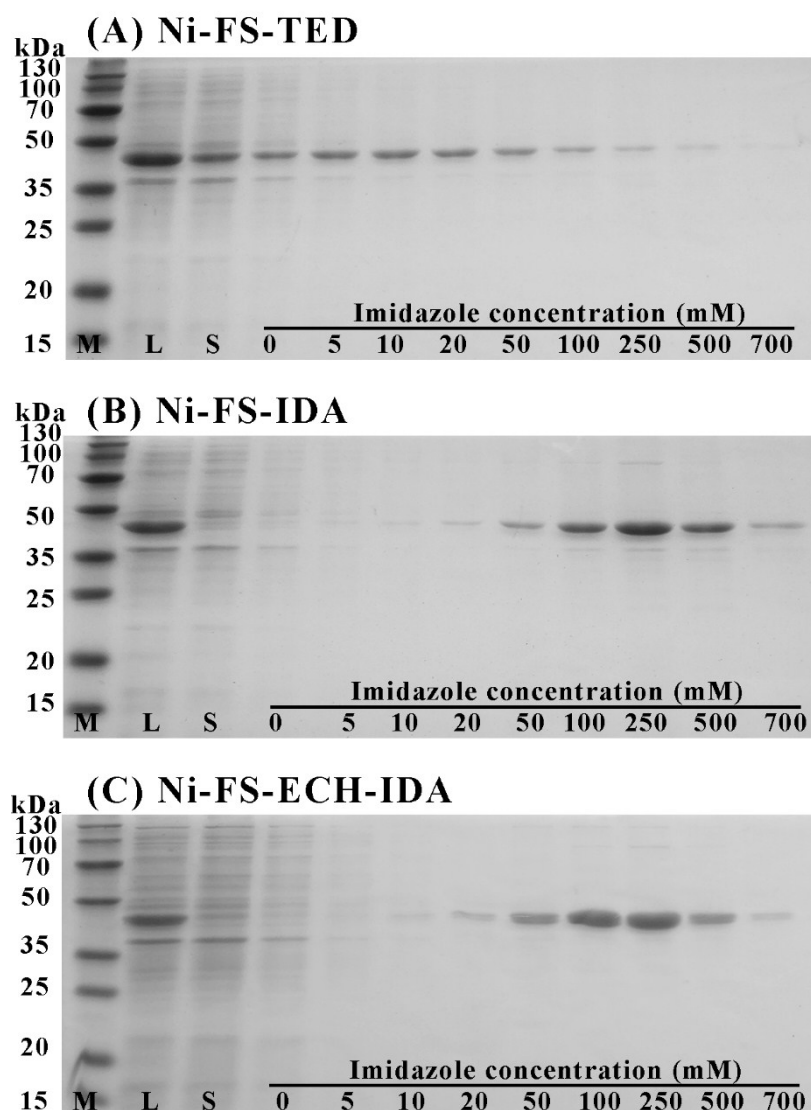

**Figure S1.** SDS-PAGE analysis of elution fractions of DspB after binding on Ni-MNPs. Panels (A-C), SDS Page analysis of DspB purification by Ni-MNPs. Lane M: the protein molecular weight marker, Lane L: cell lysate, Lane S: supernatant after adsorption; other lanes are elution fractions of stepwise gradient imidazole from 0 to 700 mM.

**Table S1.** Pseudo-second-order kinetic parameters for the adsorption of DspB by Ni-MNPs.

| Ni-MNPs       | $k_1$ [g/(mg min)] | $q_e$ (mg/g) | $v_0$ (mg/(g min)) | $R^2$ |
|---------------|--------------------|--------------|--------------------|-------|
| Ni-FS-TED     | 0.0051             | 97.1         | 47.9               | 0.998 |
| Ni-FS-IDA     | 0.0065             | 142.9        | 133.3              | 0.997 |
| Ni-FS-ECH-IDA | 0.0060             | 166.7        | 166.7              | 0.999 |

**Table S2.** Langmuir isotherm parameters for the adsorption of DspB by Ni-MNPs.

| Ni-MNPs       | $q_m$ (mg/g) | $k_L$ (mL/mg) | $\Delta G^0$ (kJ/mol) | $R^2$ |
|---------------|--------------|---------------|-----------------------|-------|
| Ni-FS-TED     | 95.7         | 57.6          | -36.4                 | 0.963 |
| Ni-FS-IDA     | 135.0        | 122.2         | -38.3                 | 0.971 |
| Ni-FS-ECH-IDA | 132.6        | 137.2         | -38.6                 | 0.959 |
